# Supplementary material
Source: bioRxiv or medRxiv preprint supplement (https://www.biorxiv.org/highwire/filestream/62242/field_highwire_adjunct_files/1/130948-10.pdf)
Supplement: Supplementary file [file 130948-10.pdf]

|        | Pearson Correlation |         |         |         |         |         |         |         |         |         |
|--------|---------------------|---------|---------|---------|---------|---------|---------|---------|---------|---------|
|        | -SDY112             | -SDY167 | -SDY180 | -SDY311 | -SDY312 | -SDY314 | -SDY315 | -SDY420 | -SDY478 | -SDY736 |
| Age    | 1.00                | 1.00    | 0.99    | 1.00    | 1.00    | 1.00    | 1.00    | 0.98    | 1.00    | 1.00    |
| Gender | 1.00                | 1.00    | 0.99    | 0.99    | 0.99    | 1.00    | 1.00    | 0.92    | 1.00    | 1.00    |
| Race   | 0.99                | 1.00    | 0.99    | 0.99    | 0.99    | 1.00    | 0.99    | 0.76    | 1.00    | 1.00    |

Supplementary Table 5: A table reporting the Pearson correlation between the results from leave-one-out analysis and the results from the full meta-analysis
